# Supplementary material for: Modest Reduction in CAG Repeat Length Rescues Motor Deficits but Not Purkinje Cell Pathology and Gliosis in Spinocerebellar Ataxia Type 1 Mice
Source: MDPI journal article supplement (doi:10.3390/neuroglia4010005), 2023-03-07
Supplement: s1 [file s1]

Archive with 1 entries (1 files):
- neuroglia-2192194-supplementary.pdf
